# Supplementary material
Source: PubMed Central journal article supplement (PMC7108891)

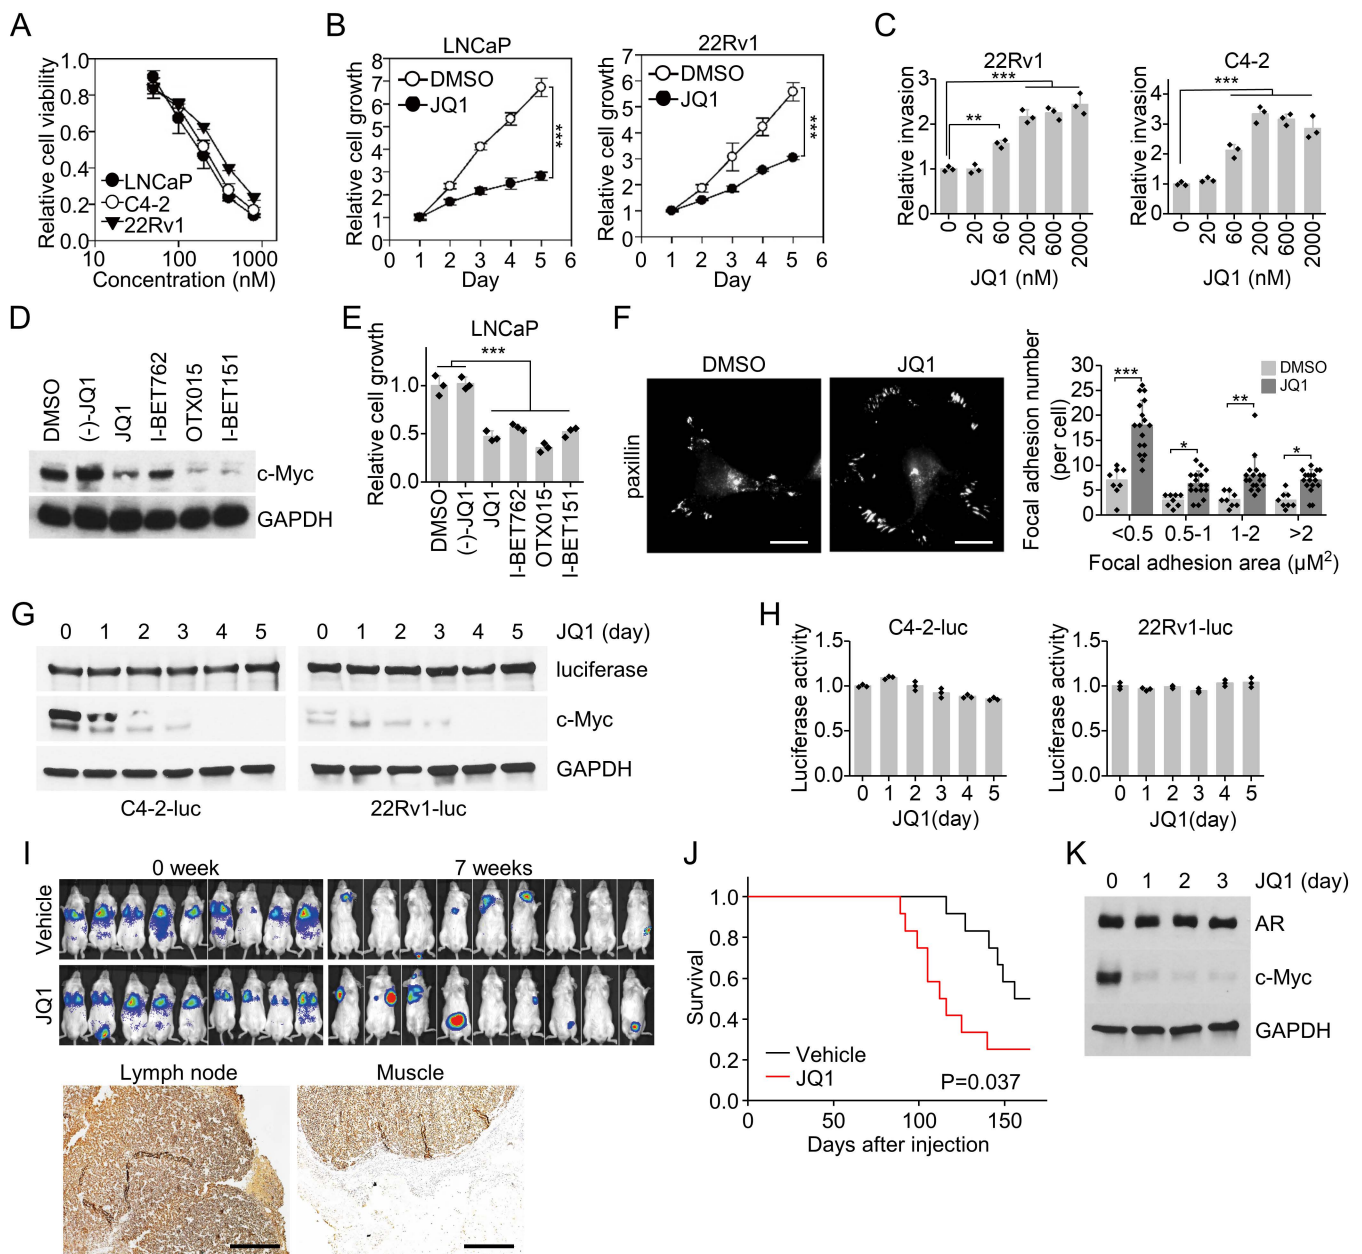

Supplemental Figure 1. JQ1 promotes prostate cancer cell invasion. (A) Cell viability was measured 96 hours after JQ1 treatment. (B) Cell growth was measured after 200 nM JQ1 treatment.  $n=3$  per group, two-way ANOVA,  $***P<0.001$ . (C) Cell invasion was measured 3 days after JQ1 treatment.  $n=3$  per group, one-way ANOVA,  $**P<0.01$ ,  $***P<0.001$ . (D) c-Myc protein levels were measured 3 days after 200 nM inhibitor treatment. (E) Cell growth was measured 3 days after 200 nM inhibitor treatment.  $n=3$  per group, one-way ANOVA,  $***P<0.001$ . (F) Focal adhesion was stained with paxillin antibody 3 days after JQ1 treatment. Representative images were shown. Scale bar: 10  $\mu\text{m}$ . Focal adhesion number and area were measured.  $n=8-17$  per group, two-way ANOVA,  $*P<0.05$ ,  $**P<0.01$ ,  $***P<0.001$ . (G) C4-2-Luc and 22Rv1-luc cells were treated with 200 nM JQ1 for indicated days. Protein levels were measured by western blot. (H) Luciferase activity was measured. (I) C4-2-Luc cells were injected into SCID mice through tail vein. 10 mg/kg JQ1 was given daily by intraperitoneal injection. Luciferase signal image was taken 10 minutes after cell injection and 7 weeks after JQ1 treatment. Metastatic sites with luciferase signal in different tissues were stained with AR antibody. Representative images of AR staining were shown. Scale bar: 400  $\mu\text{m}$ . (J) Kaplan-Meier survival curve of C4-2-Luc cells injected mice treated with JQ1. 10 mg/kg JQ1 was given daily for 7 weeks and then every other day by intraperitoneal injection.  $n=12$ , P value was determined using the log-rank test. (K) LNCaP cells were treated with 200 nM JQ1 for indicated days. Protein levels were measured by western blot.

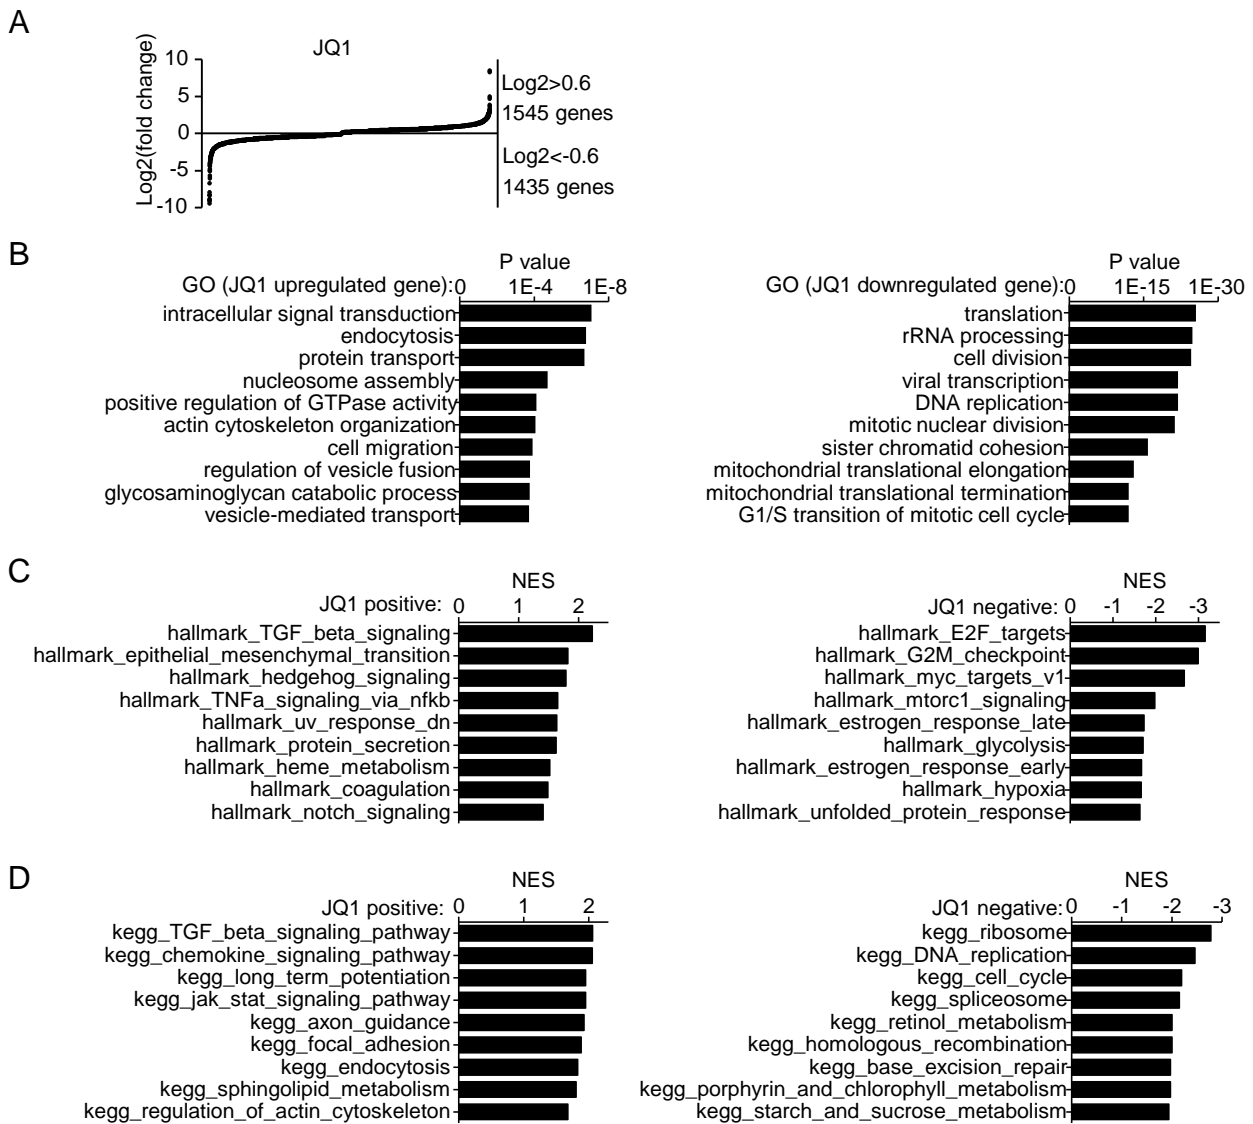

Supplemental Figure 2. JQ1 activates invasion pathways. (A) RNA-sequencing was performed in LNCaP cells 3 days after 200 nM JQ1 treatment. Log<sub>2</sub>FC (fold change) was shown. (B) GO analysis was done with David program for JQ1 upregulated genes (Log<sub>2</sub>FC>0.6) and downregulated genes (Log<sub>2</sub>FC<-0.6). (C) GSEA showed the top positive and negative enriched Hallmark signatures after JQ1 treatment. NES: normalized enrichment score. (D) GSEA showed the top positive and negative enriched KEGG pathways after JQ1 treatment. NES: normalized enrichment score.

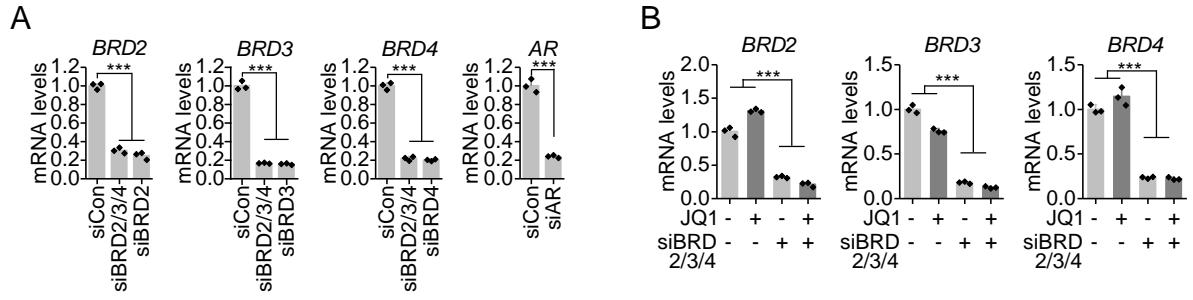

Supplemental Figure 3. (A) Gene silencing efficiency validated for Figure 2C. n=3 per group, one-way ANOVA, \*\*\*P<0.001. (B) Gene silencing efficiency validated for Figure 2E. n=3 per group, two-way ANOVA, \*\*\*P<0.001.

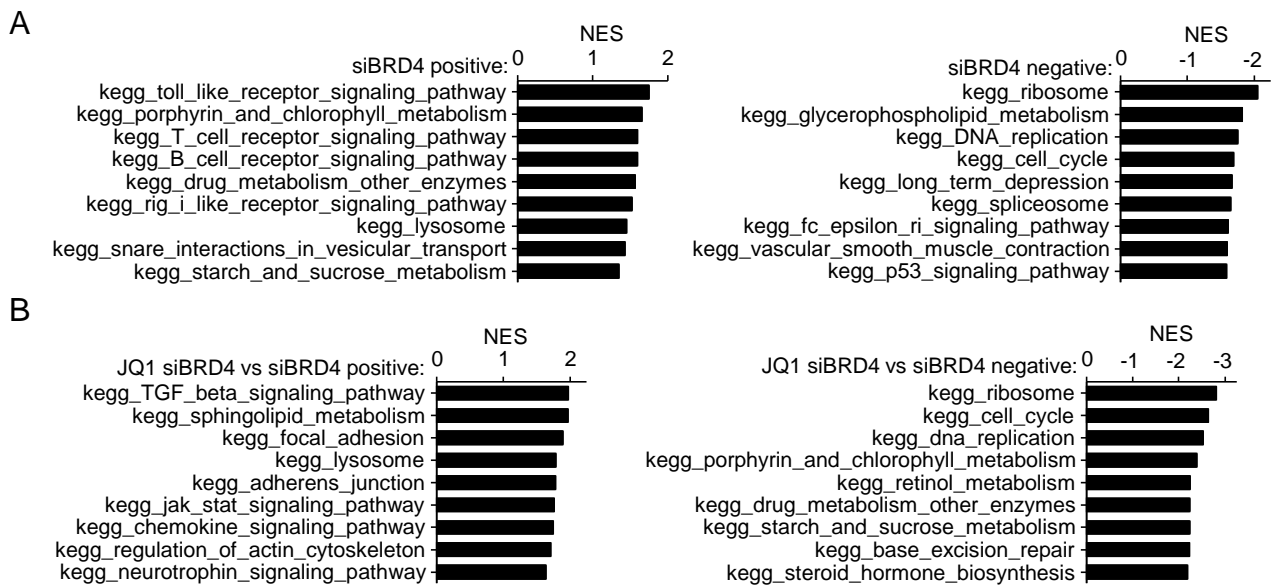

Supplemental Figure 4. JQ1 and BRD4 knockdown regulated pathways. (A) GSEA showed the top positive and negative enriched KEGG pathways by BRD4 knockdown. NES: normalized enrichment score. (B) GSEA showed the top positive and negative enriched KEGG pathways by JQ1 treatment in the absence of BRD4. NES: normalized enrichment score.

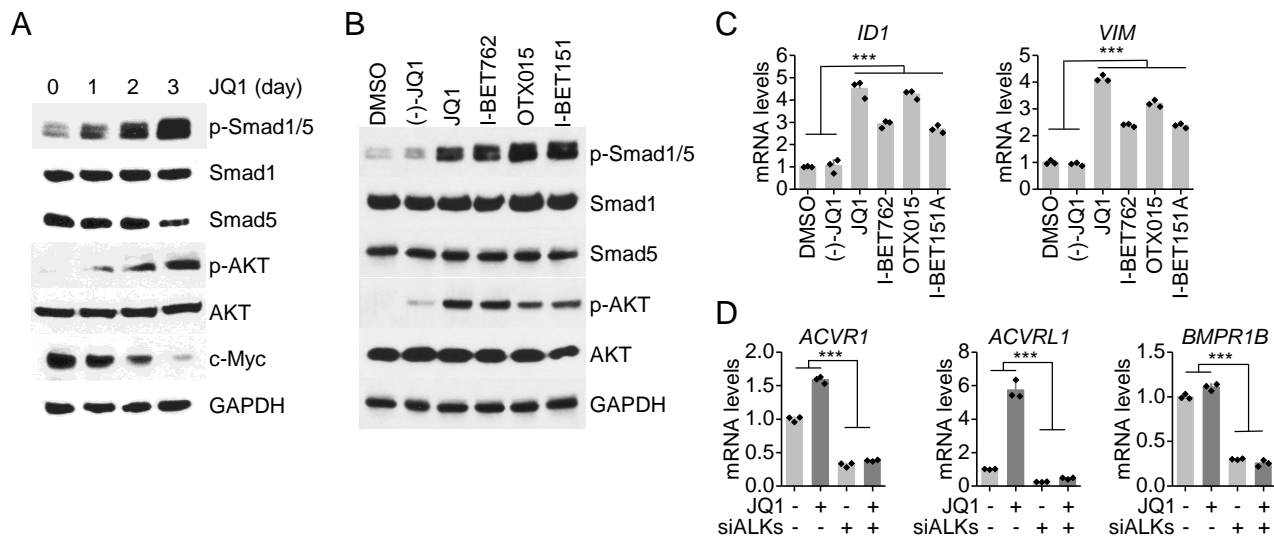

Supplemental Figure 5. JQ1 activates BMP signaling. (A) Time response of JQ1 treatment on BMP signaling. (B) Smad1/5 phosphorylation activated by JQ1 derived inhibitors. (C) BMP signaling marker ID1 and EMT marker VIM were upregulated by JQ1 derived inhibitors. mRNA was measured in LNCaP cells 3 days after 200 nM inhibitor treatment. n=3 per group, one-way ANOVA, \*\*\*P<0.001. (D) Gene silencing efficiency validated for Figure 3H. n=3 per group, two-way ANOVA, \*\*\*P<0.001.

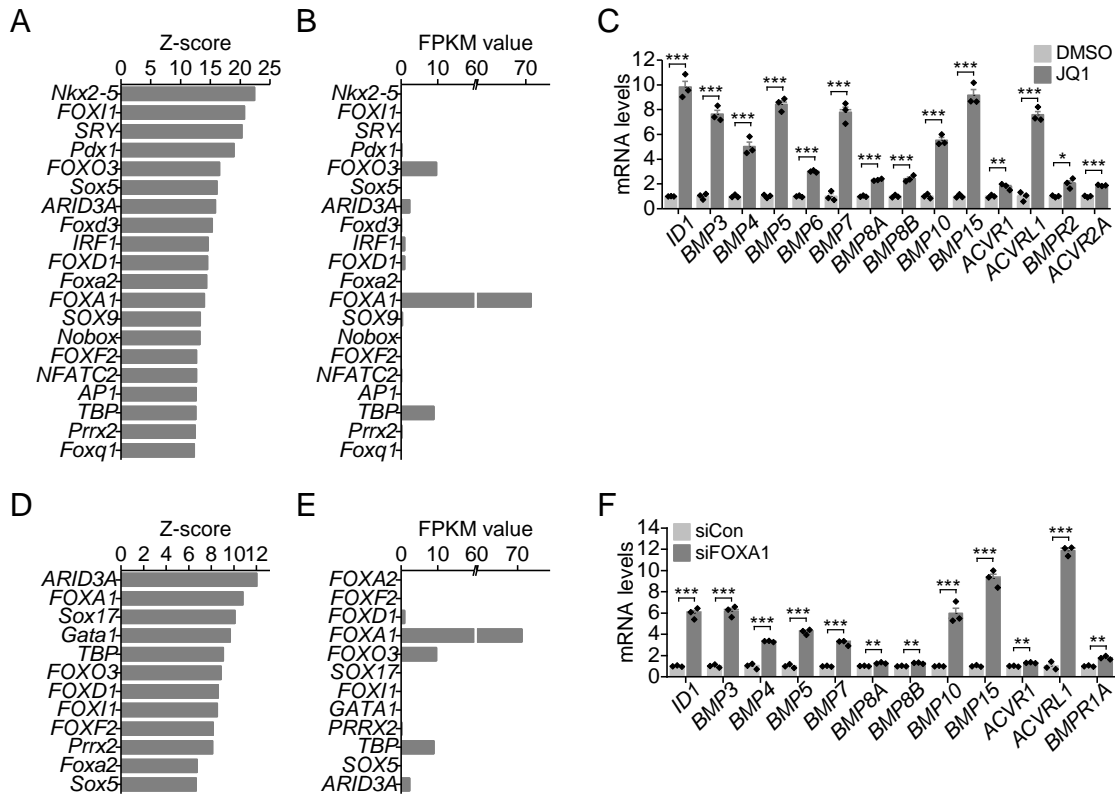

Supplemental Figure 6. FOXA1 is involved in JQ1 activated invasion genes and BMP genes. (A) Predicted transcription factors that have potential binding sites on the promoter of JQ1 activated invasion genes. Prediction was done by oPOSSUM 3.0. (B) Expression of transcription factors in LNCaP cells by RNA-sequencing. FPKM: fragments per kilobase of exon per million reads. (C) BMP signaling genes activated by JQ1. qPCR assay was done for JQ1 treated LNCaP cells. n=3 per group, t test, \*P<0.05, \*\*P<0.01, \*\*\*P<0.001. (D) Predicted transcription factors that have potential binding sites on the promoter of BMP signaling genes. Prediction was done by oPOSSUM 3.0. (E) Expression of transcription factors in LNCaP cells by RNA-sequencing. FPKM: fragments per kilobase of exon per million reads. (F) Upregulated BMP signaling genes after FOXA1 knockdown. n=3 per group, t test, \*\*P<0.01, \*\*\*P<0.001.

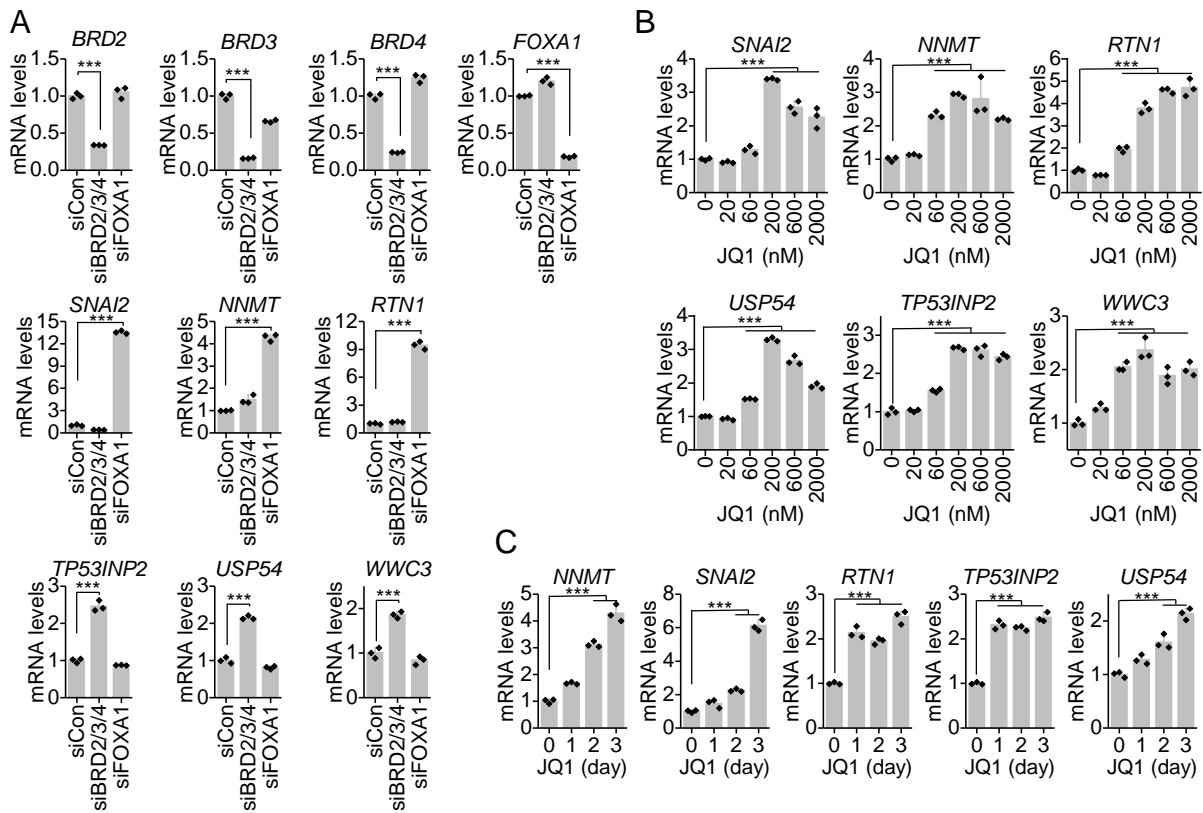

Supplemental Figure 7. JQ1 regulates activity of BET proteins and FOXA1. (A) Specific target genes regulated by BET proteins or FOXA1.  $n=3$  per group, one-way ANOVA,  $***P<0.001$ . (B) Dose dependent regulation of BET protein and FOXA1 specific target genes by JQ1.  $n=3$  per group, two-way ANOVA,  $***P<0.001$ . (C) Time dependent regulation of BET protein and FOXA1 specific target genes by JQ1.  $n=3$  per group, two-way ANOVA,  $***P<0.001$ .

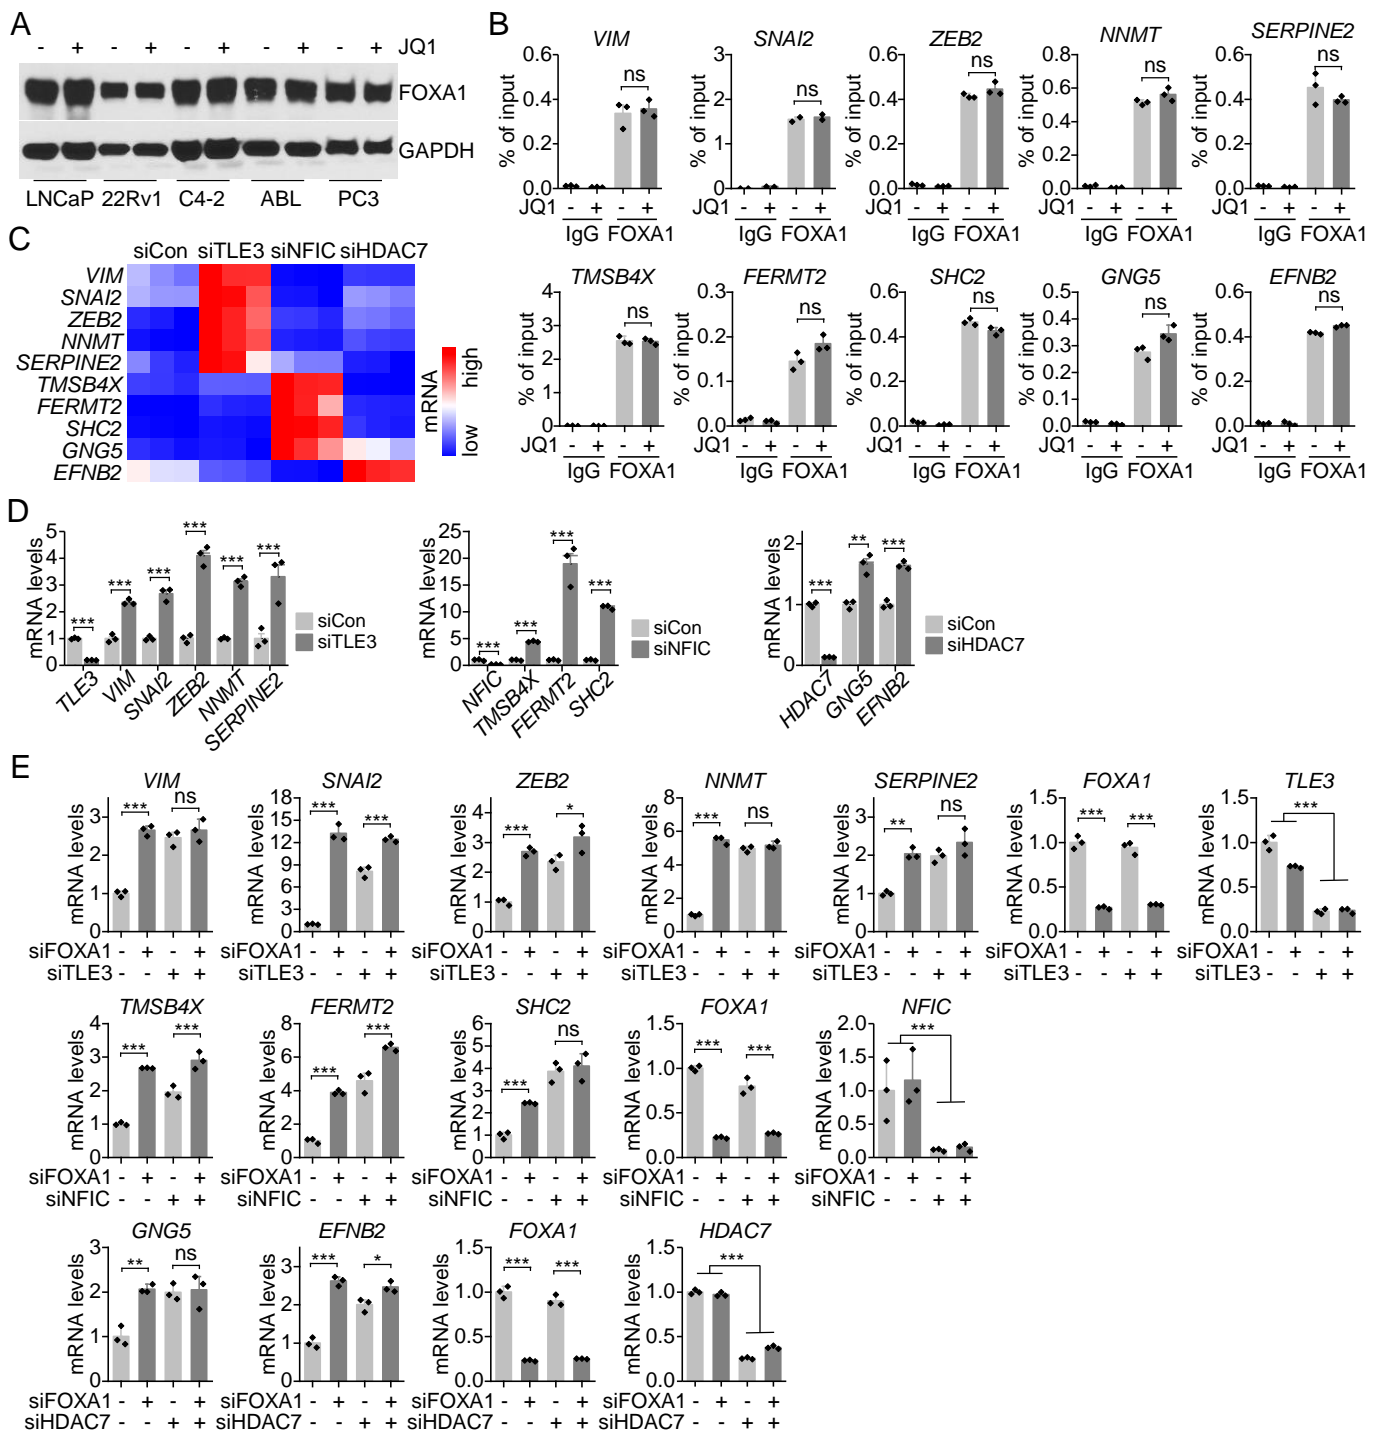

Supplemental Figure 8. FOXA1 associated repressors play important role in suppression of invasion gene expression. (A) FOXA1 protein levels after JQ1 treatment for 3 days. (B) ChIP-qPCR analysis of FOXA1 binding sites on target invasion genes after JQ1 treatment. n=3 per group, t test, ns=P>0.05. (C) FOXA1 associated repressors regulated their respective invasion genes. mRNA in LNCaP cell was measured 3 days after siRNA transfection. (D) Expression of FOXA1 repressed invasion genes after silencing of repressors. Gene expression in LNCaP cells was measured 3 days after siRNA transfection. n=3 per group, t test, \*\*P<0.01, \*\*\*P<0.001. (E) FOXA1 repressed invasion gene expression through binding repressors. Gene expression in LNCaP cells was measured 3 days after siRNA transfection. n=3 per group, two-way ANOVA, ns=P>0.05, \*P<0.05, \*\*P<0.01, \*\*\*P<0.001.



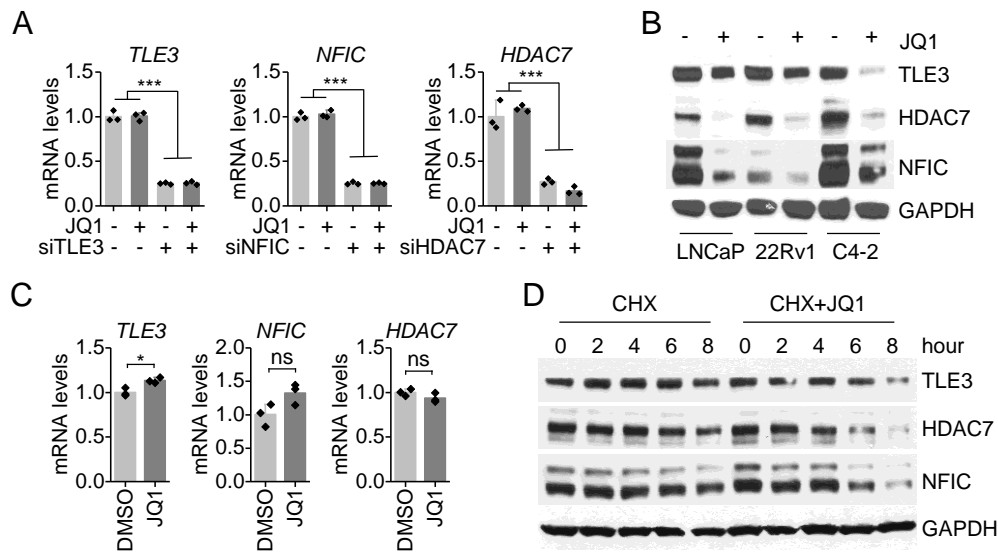

Supplemental Figure 9. JQ1 affects FOXA1 interacting repressors. (A) Gene silencing efficiency validated for Figure 5G. n=3 per group, two-way ANOVA, \*\*\*P<0.001. (B) Protein levels of FOXA1 binding repressors 3 days after JQ1 treatment. (C) mRNA levels of FOXA1 interacting repressors 3 days after JQ1 treatment. n=3 per group, t test, ns=P>0.05, \*P<0.05. (D) Enhanced degradation of FOXA1 associated repressors after JQ1 treatment. LNCaP cells were treated with 50  $\mu$ g/ml CHX and 10  $\mu$ M JQ1 for indicated times.

Supplemental Table 1. siRNAs

|                                                  |
|--------------------------------------------------|
| siRNA:                                           |
| universal negative control siRNA: Sigma (SIC001) |
| siBRD4: Dharmacon Smartpool (L-004937-00-0005)   |
| siBRD2-1: Sigma (SASI_Hs01_00018114)             |
| siBRD2-2: Sigma (SASI_Hs01_00018116)             |
| siBRD3-1: Sigma (SASI_Hs01_00086811)             |
| siBRD3-2: Sigma (SASI_Hs01_00086814)             |
| siHDAC7-1: Sigma (SASI_Hs01_00318889)            |
| siHDAC7-2: Sigma (SASI_Hs01_00318894)            |
| siNFIC-1: Sigma (SASI_Hs01_00048020)             |
| siNFIC-2: Sigma (SASI_Hs01_00048021)             |
| siFOXA1-1: GAGAGAAAAAAUCAACAGC                   |
| siFOXA1-2: CCAGACGGGUUCAUUAUU                    |
| siTLE3-1: GUCAUCUACUAAACAAGAA                    |
| siTLE3-2: GGAUGAGAAGAACCACCAU                    |
| siAR-1: GACCUACCGAGGAGCUUUC                      |
| siAR-2: CAAGGGAGGUACACCAA                        |
| siALK1: GGGAUGAACAGUCCUGGUU                      |
| siALK2: CCAUCCAGGUGGAUUGUUU                      |
| siALK3: GGAUACAAGCUGGGAACUU                      |

Supplemental Table 2. q-PCR primers

|                                   |
|-----------------------------------|
| q-PCR primers:                    |
| ACTB-F: TGGCATTGCCGACAGGAT        |
| ACTB-R: GCTCAGGAGGAGCAATGATCT     |
| VIM-F: CATCAACACCGAGTTCAAG        |
| VIM-R: ATCTTATTCTGCTGCTCCA        |
| SNAI2-F: CGAACTGGACACACATACAGTG   |
| SNAI2-R: CTGAGGATCTCTGGTTGTGGT    |
| ZEB2-F: CGGTAGTGAGTCATAATGGT      |
| ZEB2-R: GTCTCCTTGAGTCAGTAGTC      |
| NNMT-F: TGGCCCTCCCTCTACCATAC      |
| NNMT-R: TCCTTCCATCAGTTCAGCCC      |
| SERPINE2-F: TCAGTGAAGATGGAACCAA   |
| SERPINE2-R: TGTAGGATTATGTCCGGATGA |
| FERMT2-F: AGAACAAGCAGCCAGGCTAT    |
| FERMT2-R: TTTTGCCCCCTTGGAACCTT    |
| SHC2-F: GGACTTCCTTGTGCGAGACA      |
| SHC2-R: CAGGTGGCTGATGCTCTCAA      |
| TMSB4X-F: GAATCGTAATGAGGCGTGCG    |
| TMSB4X-R: CGGCCTTCGTTGTCAGTAGT    |
| GNG5-F: CCACAAACTGGGAGGAAA        |
| GNG5-R: CGCGAAGAACTAAGAGGG        |
| QSOX1-F: ATGGCTGACCTGGAATCTGC     |
| QSOX1-R: CACGGAGTGCAGGAAGTTCT     |
| LAMC1-F: GAGGCAAGATATCGCCGTGA     |
| LAMC1-R: GTATCTCGCCTGTCCACTCG     |
| APLP1-F: CTGCCTAAAGCCGACAGACA     |
| APLP1-R: TGGTCGTTGATAAGGGCGAT     |
| GNAI2-F: AAGTGA CTCCGTGCCTTGA     |
| GNAI2-R: GAACAGCCCTTGGAACCC       |
| EFNB2-F: ACTGTGCCAAACCAGACCAA     |
| EFNB2-R: ACCCCTCCCTCCTGGTTATC     |
| GSN-F: GCTCTACAAGGTCTCCAAT        |
| GSN-R: GTCCAGGATGAAGCAGTC         |
| SEMA3C-F: CGGCCAGAAACACACTTTG     |
| SEMA3C-R: TACACACACACGGCTGATCC    |
| PLXNA3-F: TCTTTAAGCTGGCCCCAAC     |
| PLXNA3-R: GAGCAGCAGCTTGTTGATGT    |
| FSTL1-F: TGGCAAGACCTACCTCAA       |
| FSTL1-R: GCAGATGGACTTACGGATT      |
| BRD2-F: GAGGACGAGGAGGAAGAA        |
| BRD2-R: GAGCAGCCAGTTGTTTCAT       |
| BRD3-F: CAGGCTCAGCAGAAGAAG        |
| BRD3-R: GAGTCGTAGGAGGCAGAT        |
| BRD4-F: GGAGGAAGAGGACAAGTG        |
| BRD4-R: CCGTGACTGGATGATGTG        |
| AR-F: CAGTGGATGGGCTGAAAAAT        |
| AR-R: GGAGCTTGGTGAGCTGGTAG        |

|                                    |
|------------------------------------|
| ACVR1-F: CTCTCCGAGTACCCCAGTGA      |
| ACVR1-R: ACCATTGTACAACCTTAATGCAGGC |
| ACVRL1-F: ATTGTGCAAGGCTCGGAAGA     |
| ACVRL1-R: CCAGAGGACGTGCAAACCTCT    |
| BMPR1B-F: GAACTTGCTGTATTGCTGAC     |
| BMPR1B-R: AACACTTCTGGAGGCATATAG    |
| ID1-F: TGTTACTCACGCCTCAAG          |
| ID1-R: TGAAGGTCCCTGATGTAGT         |
| BMP3-F: AGAGCCAGACGCTCCAATTT       |
| BMP3-R: TCCAGCCAATATCTGCAAAGTC     |
| BMP4-F: AGCGTAGCCCTAAGCATCAC       |
| BMP4-R: AGTCATTCCAGCCCACATCG       |
| BMP5-F: TGGTAGTACGCTCATGTGGC       |
| BMP5-R: AGGAAATTCCCCGTTTGTCTGA     |
| BMP6-F: CTTTCTGCGAGCGGGTTTG        |
| BMP6-R: CCGTCGCTCCCCTCAAAT         |
| BMP7-F: GACTTCAGCCTGGACAACGA       |
| BMP7-R: GCAAGCCCAAATGGAGAGG        |
| BMP8A-F: CTCAGCCACTGACTTGGTGT      |
| BMP8A-R: TCTCTGGGTTGGAAGAGCCT      |
| BMP8B-F: GTGGCTTCCTTATCTGCG        |
| BMP8B-R: GTTATGAGGCTGCTTCTGG       |
| BMP10-F: GGGAGTGCAGAGAGCAACAT      |
| BMP10-R: TGGGAGAACTCCTCTACGGG      |
| BMP15-F: TTCCAAATCAGCTTCCGCCA      |
| BMP15-R: TCGCGTAGTACTCGGAGACA      |
| BMPR1A-F: AAAAAGTGGCGGTGAAAGT      |
| BMPR1A-R: TGTCTGCCGCTATGAAAC       |
| BMPR2-F: AGATCCTGGGCCATCAAAGC      |
| BMPR2-R: ACTCACCTATCTGTATACTGCTGC  |
| ACVR2A-F: ACAAGGTTGTTGGCTGGATGA    |
| ACVR2A-R: ACACATATTGCCCTCACAGCA    |
| FOXA1-F: CTACTIONGACAGACACGCAGG    |
| FOXA1-R: CCGCTCGTAGTCATGGTGT       |
| HDAC7-F: GTCACCTGACCTCGCCTTCAA     |
| HDAC7-R: GTGCACGTCCCAGTCTACAA      |
| TLE3-F: TGGTGAGCTTTGGAGCTGTT       |
| TLE3-R: ATCTGCCCATCAGCACTCAC       |
| NFIC-F: GCAGTACCAGCAGGACTTGT       |
| NFIC-R: GGATCCCCTTCCTCCTTCT        |
| RTN1-F: AAGCACCAGGCACAGATTGA       |
| RTN1-R: CGCCTGGGATTTTAGCCTGA       |
| TP53INP2-F: TGACCATGTGACGTGTCAAC   |
| TP53INP2-R: ACACACATACACAGGCATGC   |
| USP54-F: AAAATTAGCCAGGCGTGACG      |
| USP54-R: TCACTCTATTGCCAAGCTGGAG    |
| WWC3-F: AGCCTGCAAGAAACAGATGC       |
| WWC3-R: TTGTCATGGCTGCATTGAGC       |

Supplemental Table 3. ChIP-qPCR primers

|                                         |
|-----------------------------------------|
| ChIP-PCR primers:                       |
| FOXA1-VIM-F: TAGGCCACTGGGCAAATACCT      |
| FOXA1-VIM-R: CTCATGTCACTTGAAAGAGCCC     |
| FOXA1-SNAI2-F: CAGGAGAAAATGCCTTTGGA     |
| FOXA1-SNAI2-R: ATGAGGAATCTGGCTGCTGT     |
| FOXA1-ZEB2-F: GAGGCATCGGTCACCTCCAC      |
| FOXA1-ZEB2-R: CCAGATCGGCTGTTGCATAGT     |
| FOXA1-NNMT-F: AGGCTTTCAGGAAAAGGGTGT     |
| FOXA1-NNMT-R: CTCCAGAGGTGCTACACCAA      |
| FOXA1-SERPINE2-F: TGCAGCTTTGGTCCATCCAT  |
| FOXA1-SERPINE2-R: ACCCACCTCTTGTACCCAGT  |
| FOXA1-TMSB4X-F: CAGGTGCCTACGTTTCCGT     |
| FOXA1-TMSB4X-R: TCATTCCTCTCACGCTGGTG    |
| FOXA1-FERMT2-F: AGCCTACTTGTCTGGCTTGTC   |
| FOXA1-FERMT2-R: ACAGGGGTATGTAGGTTTGCC   |
| FOXA1-SHC2-F: CTCTCTCAGAAGACGGGGGA      |
| FOXA1-SHC2-R: GCCTCCACCTAGGAGGGTAA      |
| FOXA1-GNG5-F: AAGCAGGATGGGAAATGCCT      |
| FOXA1-GNG5-R: TCAGAGTGGTTGTGAAAATTAAGGG |
| FOXA1-EFNB2-F: AGGCTCTACTCCGCTACACA     |
| FOXA1-EFNB2-R: ATTCGAGATCCCAGCGTGAC     |

Full unedited gel for Figure 3

Figure 3A

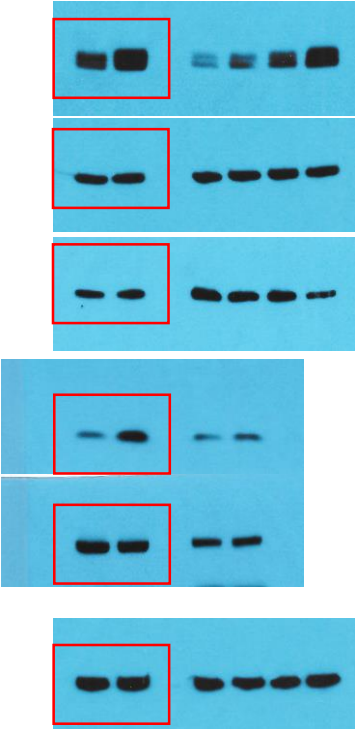

Figure 3B

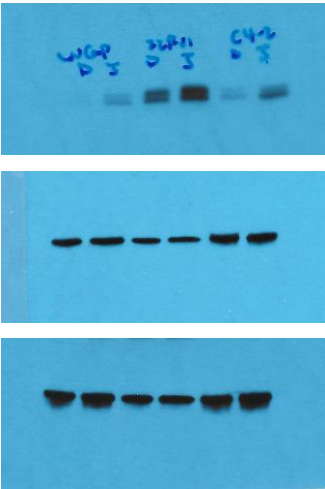

Figure 3E

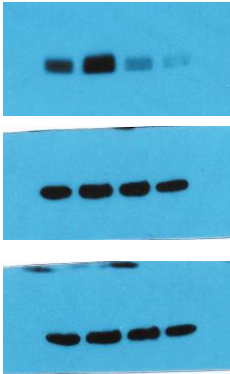

Figure 3F

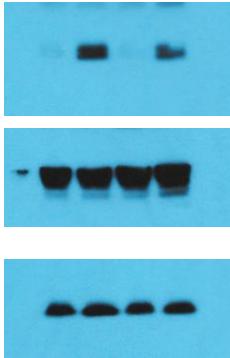

# Full unedited gel for Figure 5

Figure 5A

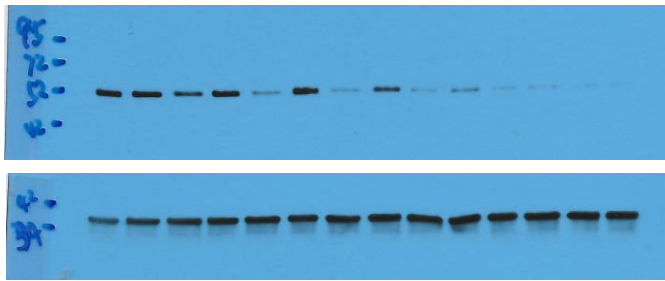

Figure 5B

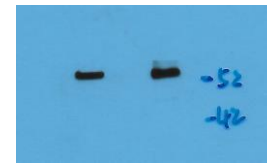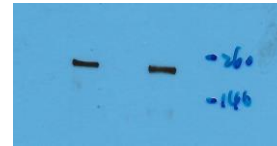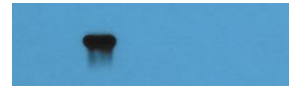

Figure 5C

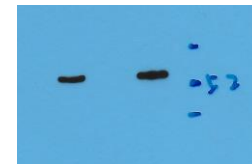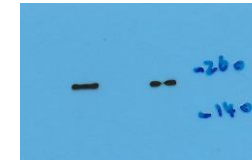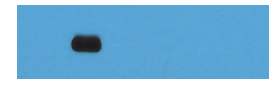

Figure 5D

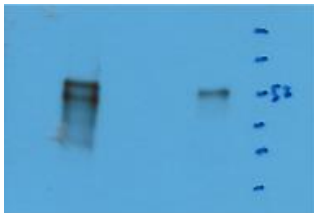

Figure 5E

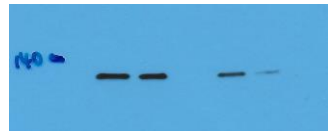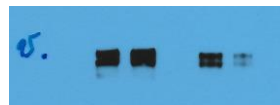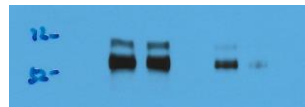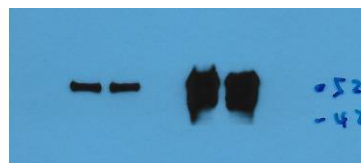

# Full unedited gel for Supplemental Figure 1

## Supplemental Figure 1D

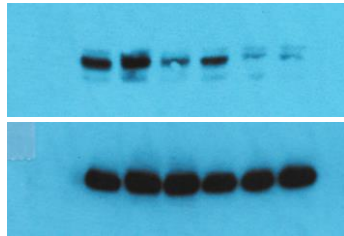

## Supplemental Figure 1G

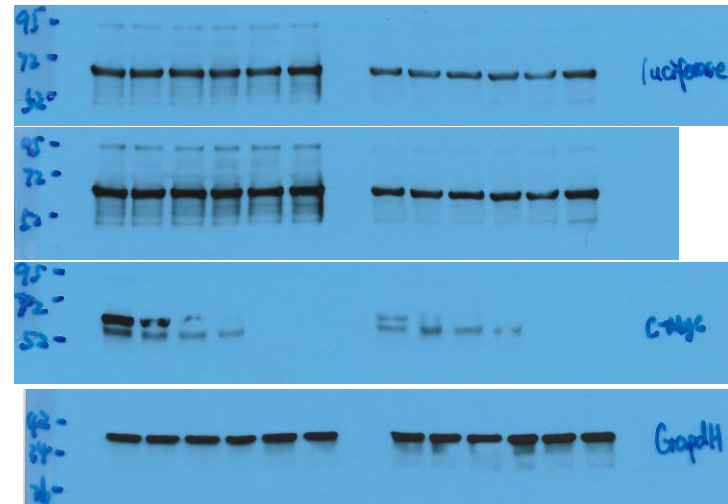

## Supplemental Figure 1K

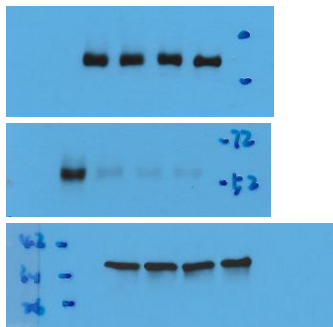



Full unedited gel for Supplemental Figure 5

Supplemental Figure 5A

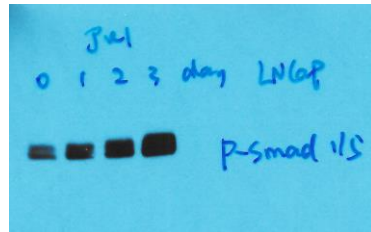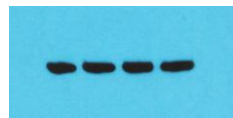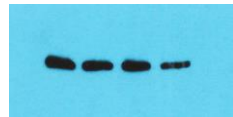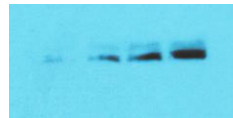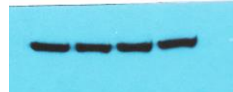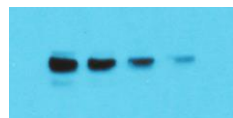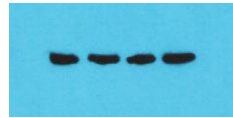

Supplemental Figure 5B

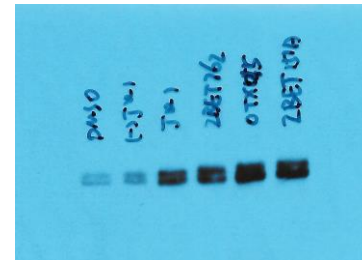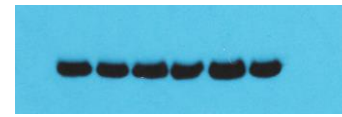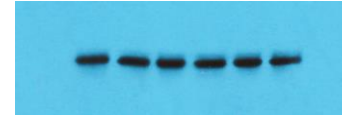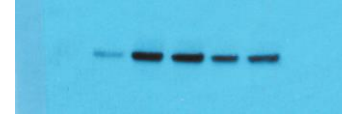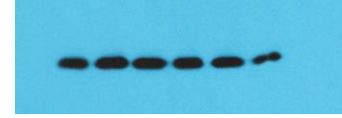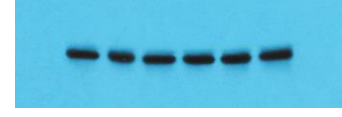

Supplemental Figure 8A

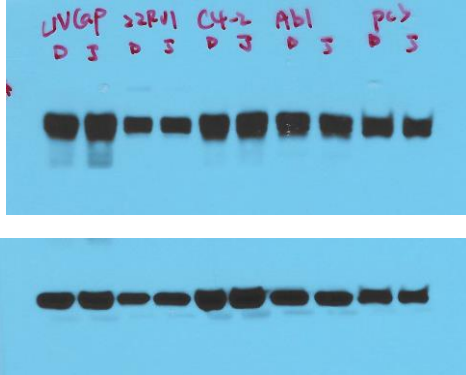

Supplemental Figure 9A

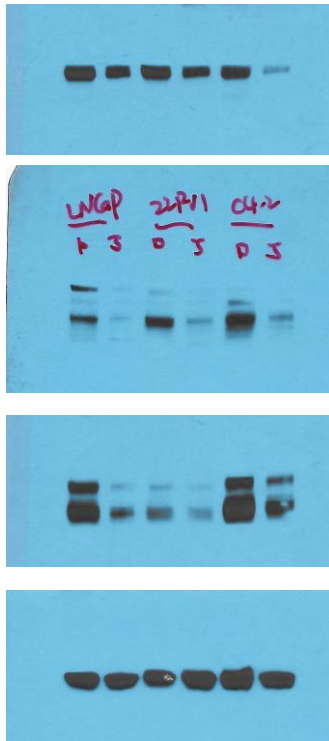

Supplemental Figure 9D

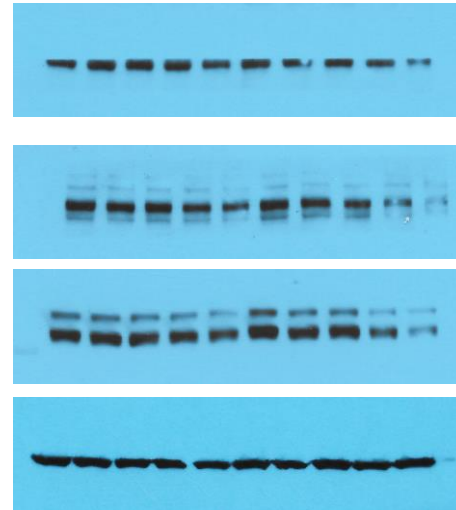

Supplement: jci-130-126327-s133.pdf [file jci-130-126327-s133.pdf]
